# Supplementary material
Source: Springer Nature journal article supplement (https://www.springermedizin.de/resource/supplementary/12885_2011_2950_MOESM4_ESM.pdf/9462340)

**A**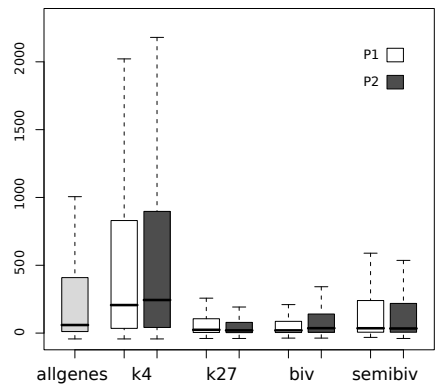

Absolute expression levels in normal colon

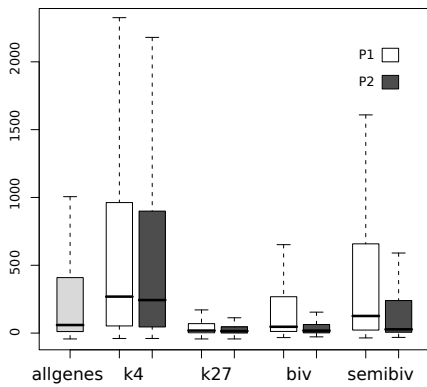

Absolute expression levels in colon tumors

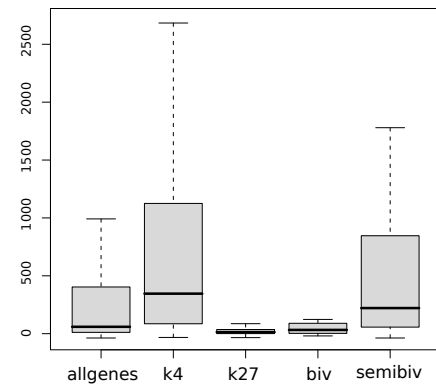

Absolute expression levels in HT29

**B**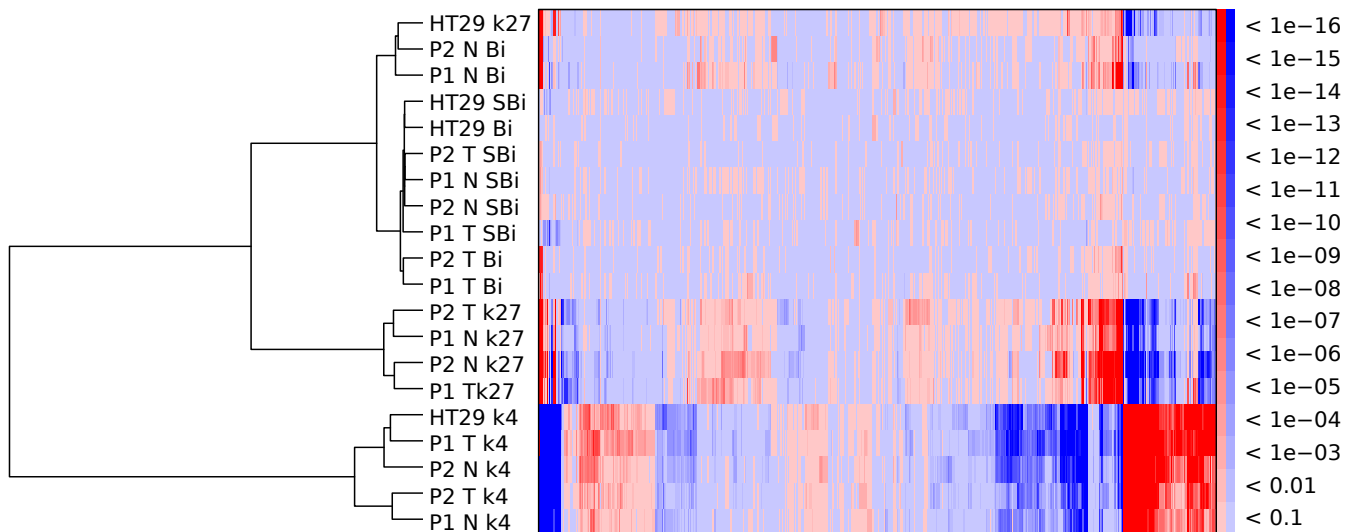

Supplement: MOESM4 [file 9462340]
